# Supplementary material
Source: Springer Nature journal article supplement (https://www.springermedizin.de/resource/supplementary/12872_2014_746_MOESM6_ESM.pdf/9430804)

Figure 8

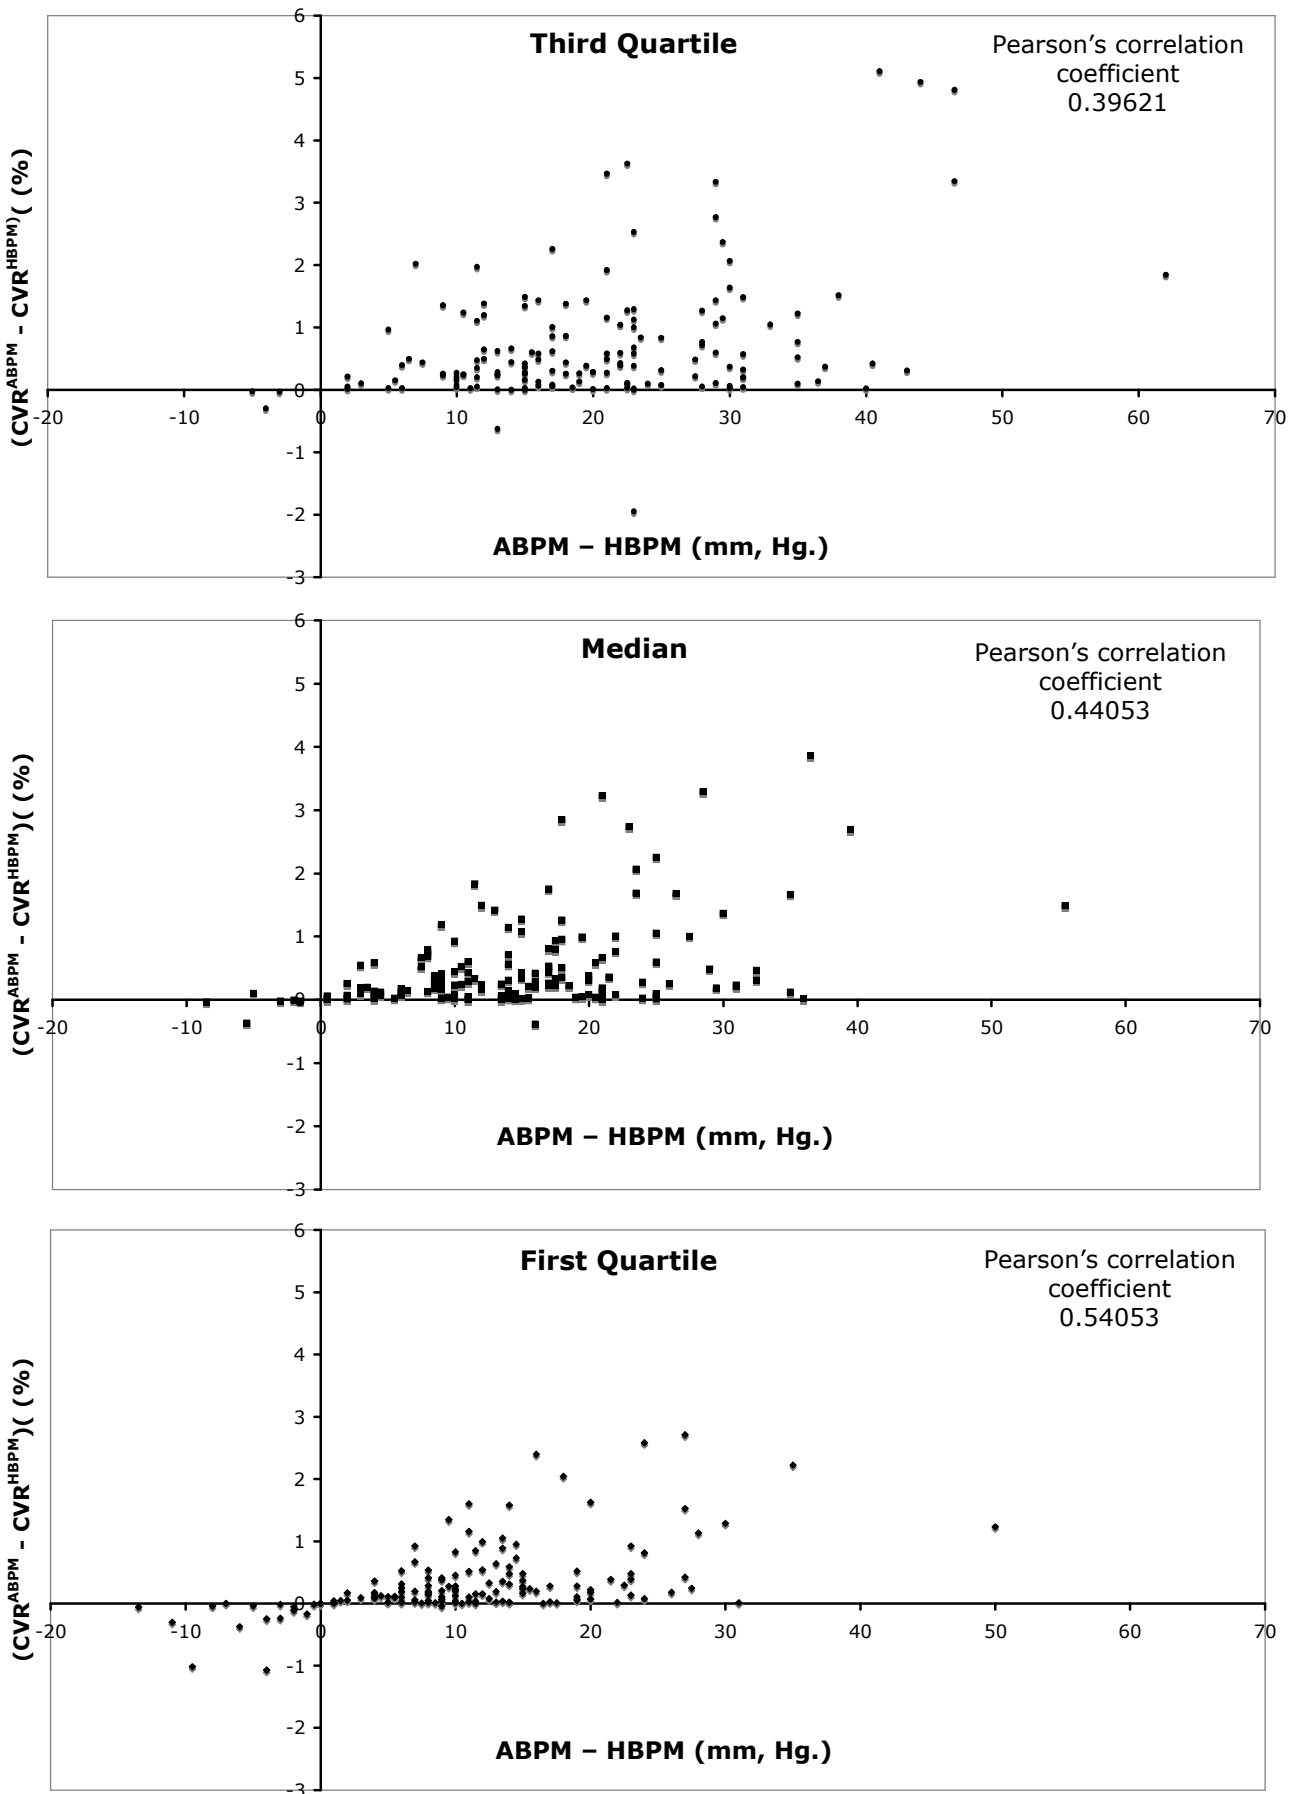

Supplement: MOESM6 [file 9430804]
